# Supplementary material for: Feed in summer, rest in winter: microbial carbon utilization in forest topsoil
Source: PubMed Central journal article supplement (PMC5604414; doi:10.1186/s40168-017-0340-0), 2017-09-18
Supplement: 40168_2017_340_MOESM2_ESM.pdf [file 40168_2017_340_MOESM2_ESM.pdf]

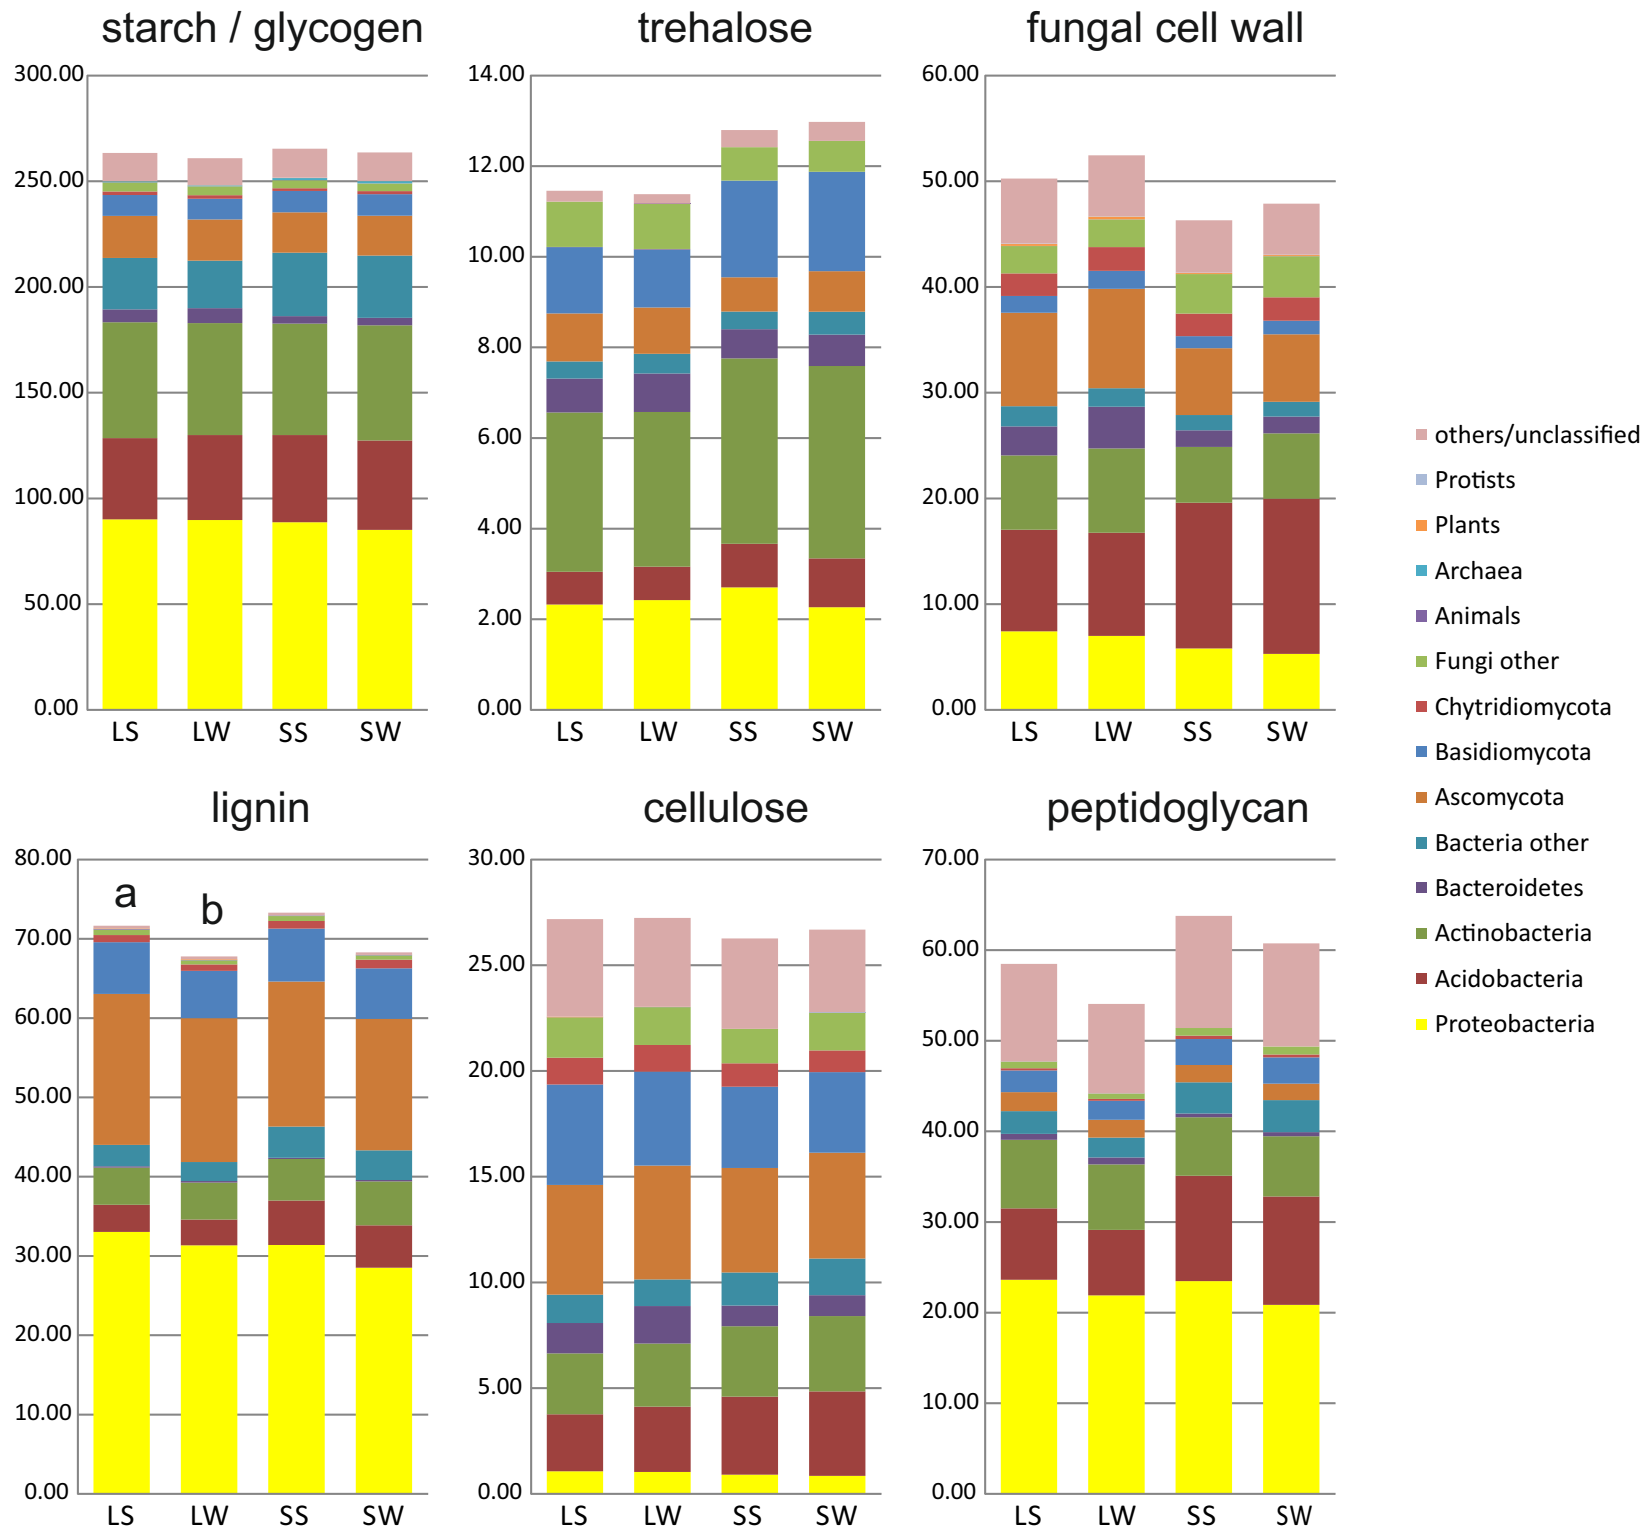

Figure S1.: Read abundances of GH and AA by functional groups in the metagenome of litter and soil of the *Picea abies* forest. Numbers indicate the share of reads in the total metatranscriptome in ppm. Significant differences in read abundances among seasons are indicated by different letters. LS - litter summer, LW - litter winter, SS - soil summer, SW - soil winter.
