# Supplementary material for: Feed in summer, rest in winter: microbial carbon utilization in forest topsoil
Source: PubMed Central journal article supplement (PMC5604414; doi:10.1186/s40168-017-0340-0), 2017-09-18
Supplement: 40168_2017_340_MOESM3_ESM.pdf [file 40168_2017_340_MOESM3_ESM.pdf]

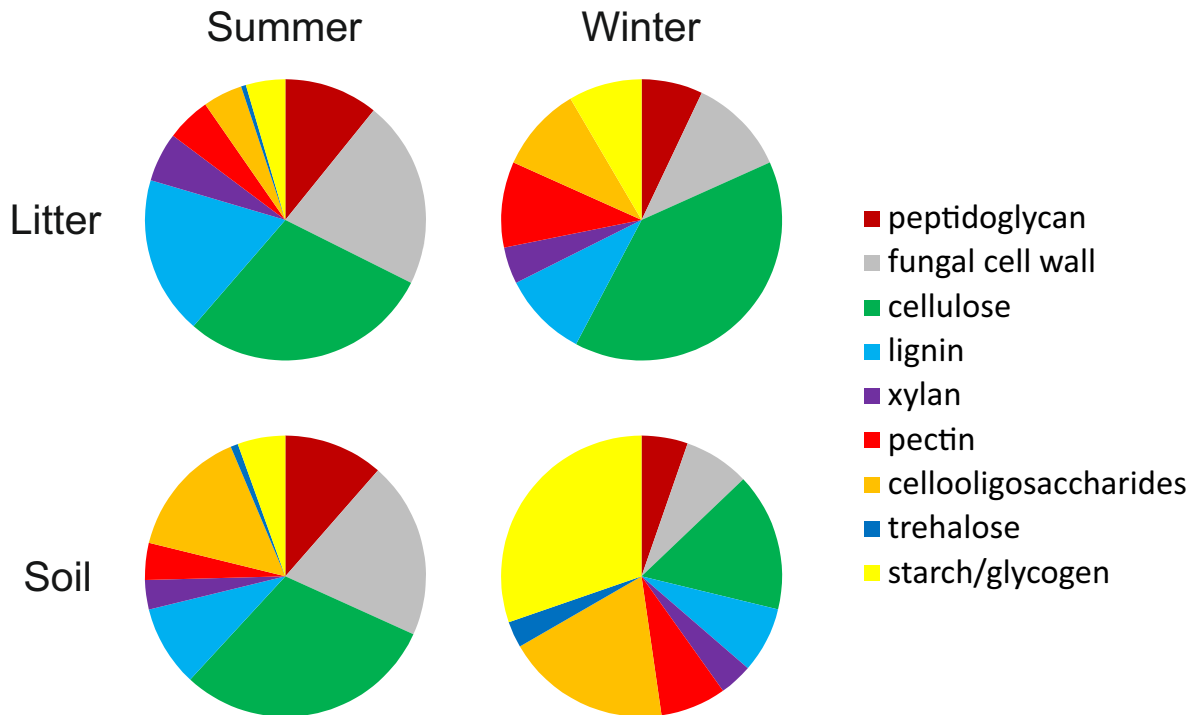

Figure S2.: Functional classification of GH and AA genes with significantly higher expression in summer and in winter within litter and within soil of a *Picea abies* forest.
